# Supplementary material for: Temperature Dramatically Shapes Mosquito Gene Expression With Consequences for Mosquito–Zika Virus Interactions
Source: PubMed Central journal article supplement (PMC7303344; doi:10.3389/fmicb.2020.00901), 2020-06-12
Supplement: Data_Sheet_1.pdf [file Data_Sheet_1.pdf]

## Supplementary Material and Captions

### Supplementary Figures

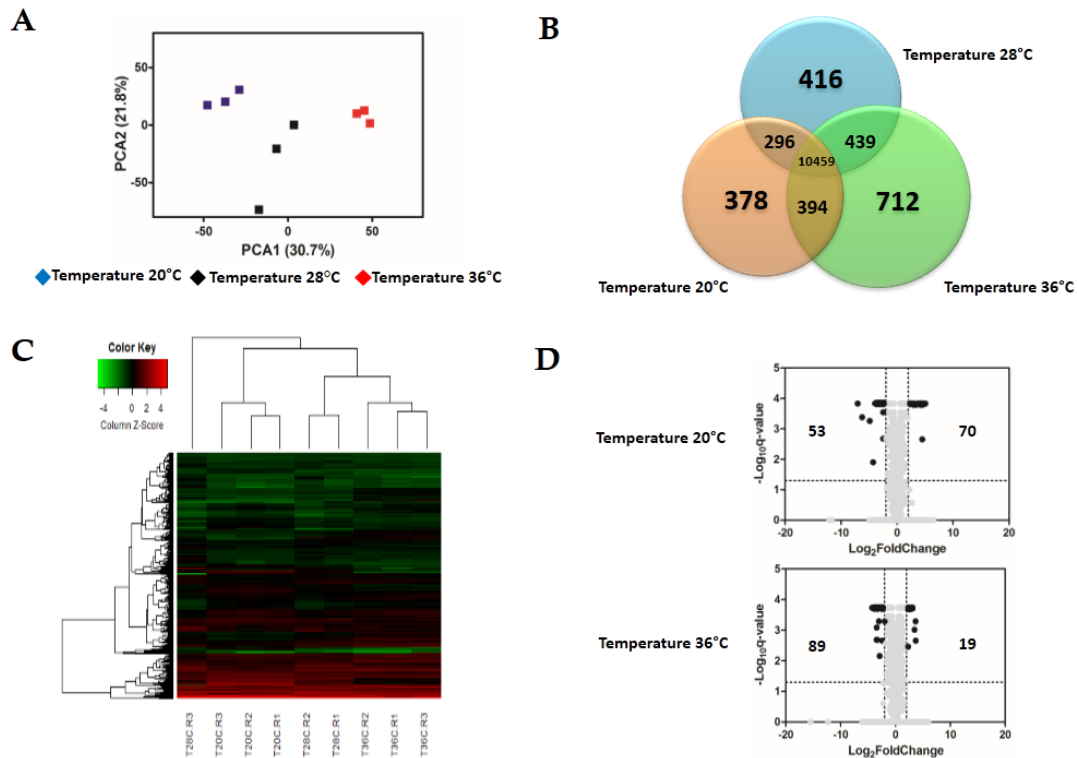

**Supplementary Figure S1. Effect of the temperature in the expression profile of non-infected *A. aegypti*.** (A) Principal Component Analysis (PCA) plot showing the global gene expression profiles. (B) Venn Diagram reporting the number of specific and shared genes. (C) Heatmap plot showing local differences (TC20R1: represents the replicate 1 for the temperature 20°C). (D) Volcano plot representing the differential gene expression from RNAseq samples from *Aedes aegypti* exposed in three different constant temperatures (20°C, 28°C, 36°C) at 24 hs.

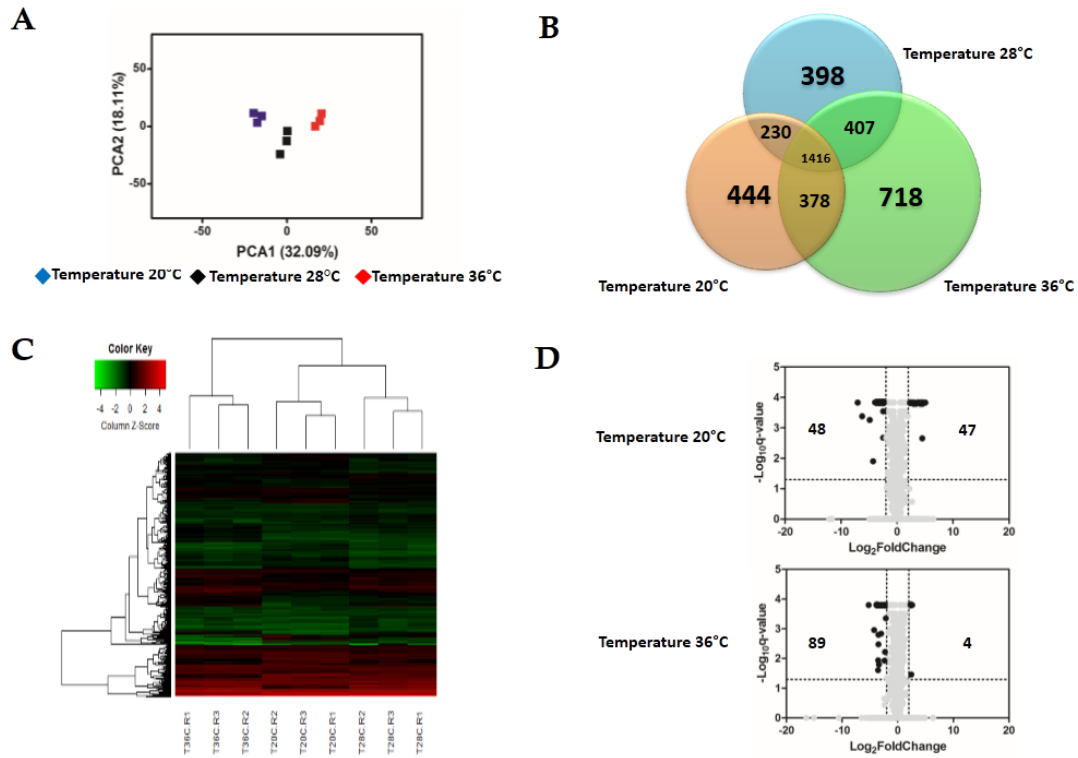

**Supplementary Figure S2. Effect of the temperature in the expression profile of Zika-infected *A. aegypti*.** (A) Principal Component Analysis (PCA) plot showing the global gene expression profiles. (B) Venn Diagram reporting the number of specific and shared genes. (C) Heatmap plot showing local differences (TC20R1: represents the replicate 1 for the temperature 20°C). (D) Volcano plot representing the differential gene expression from RNAseq samples from infected *Aedes aegypti* exposed in three different constant temperatures (20°C, 28°C, 36°C) at 24 hs.

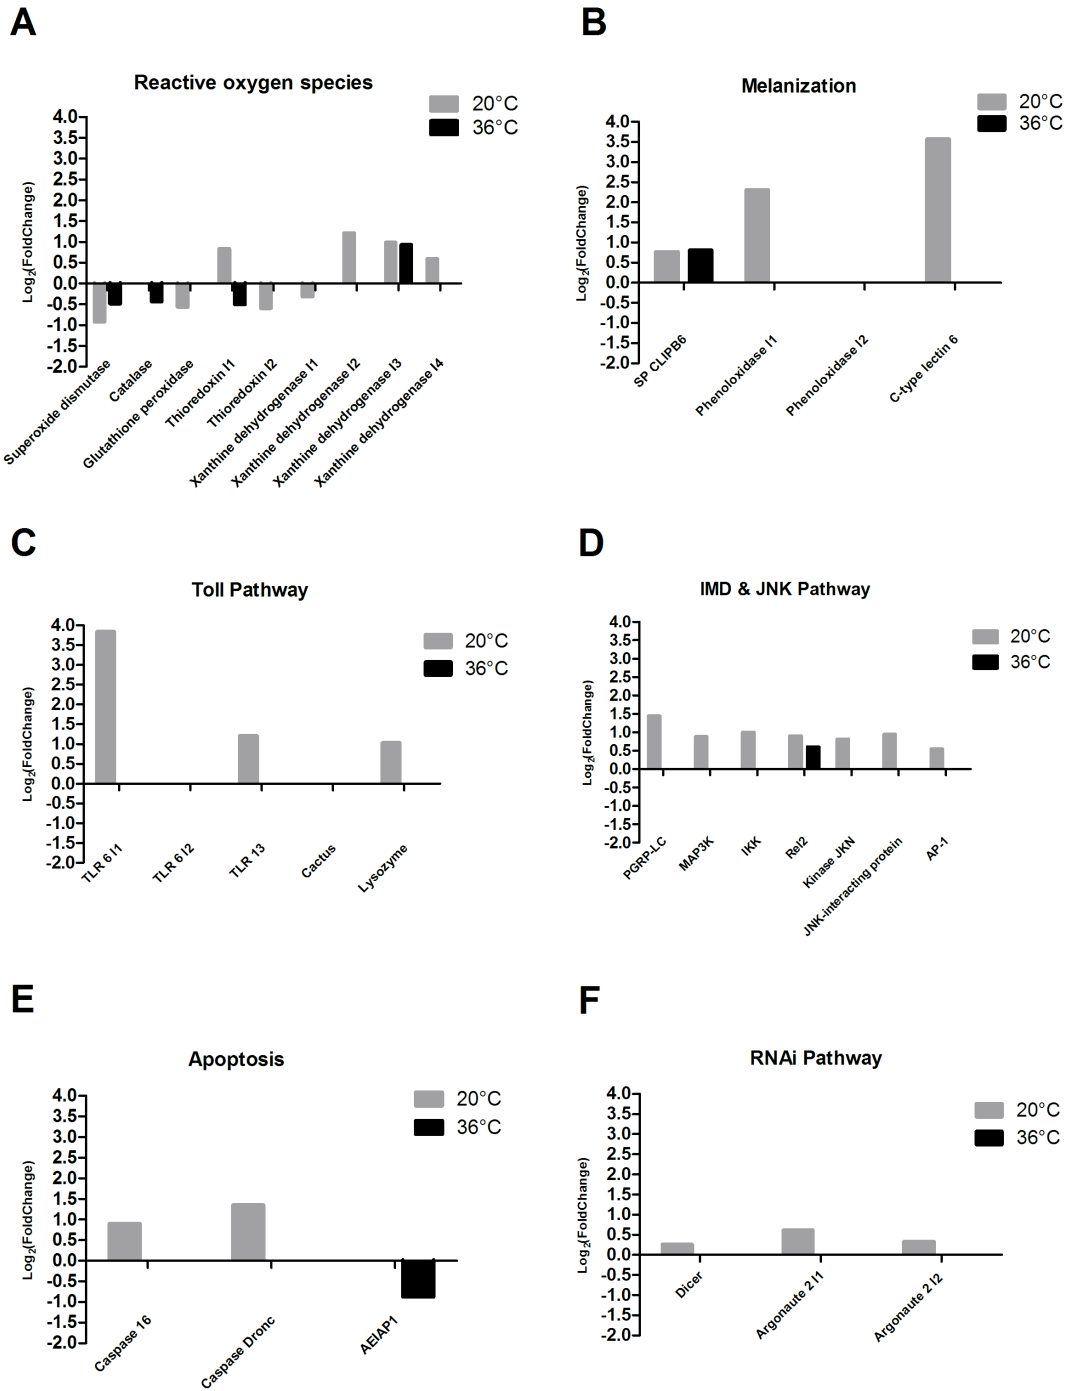

**Supplementary Figure S3. Analysis of differentially expressed genes related to the immune response in uninfected mosquitoes maintained at 20°C and 36°C compared to those kept at 28°C 48 hours after blood-feeding (A) Reactive Oxygen Species; (B) Melanization; (C) Toll Pathway; (D) IMD & JNK Pathway; (E) Apoptosis; (F) RNAi Pathway.**

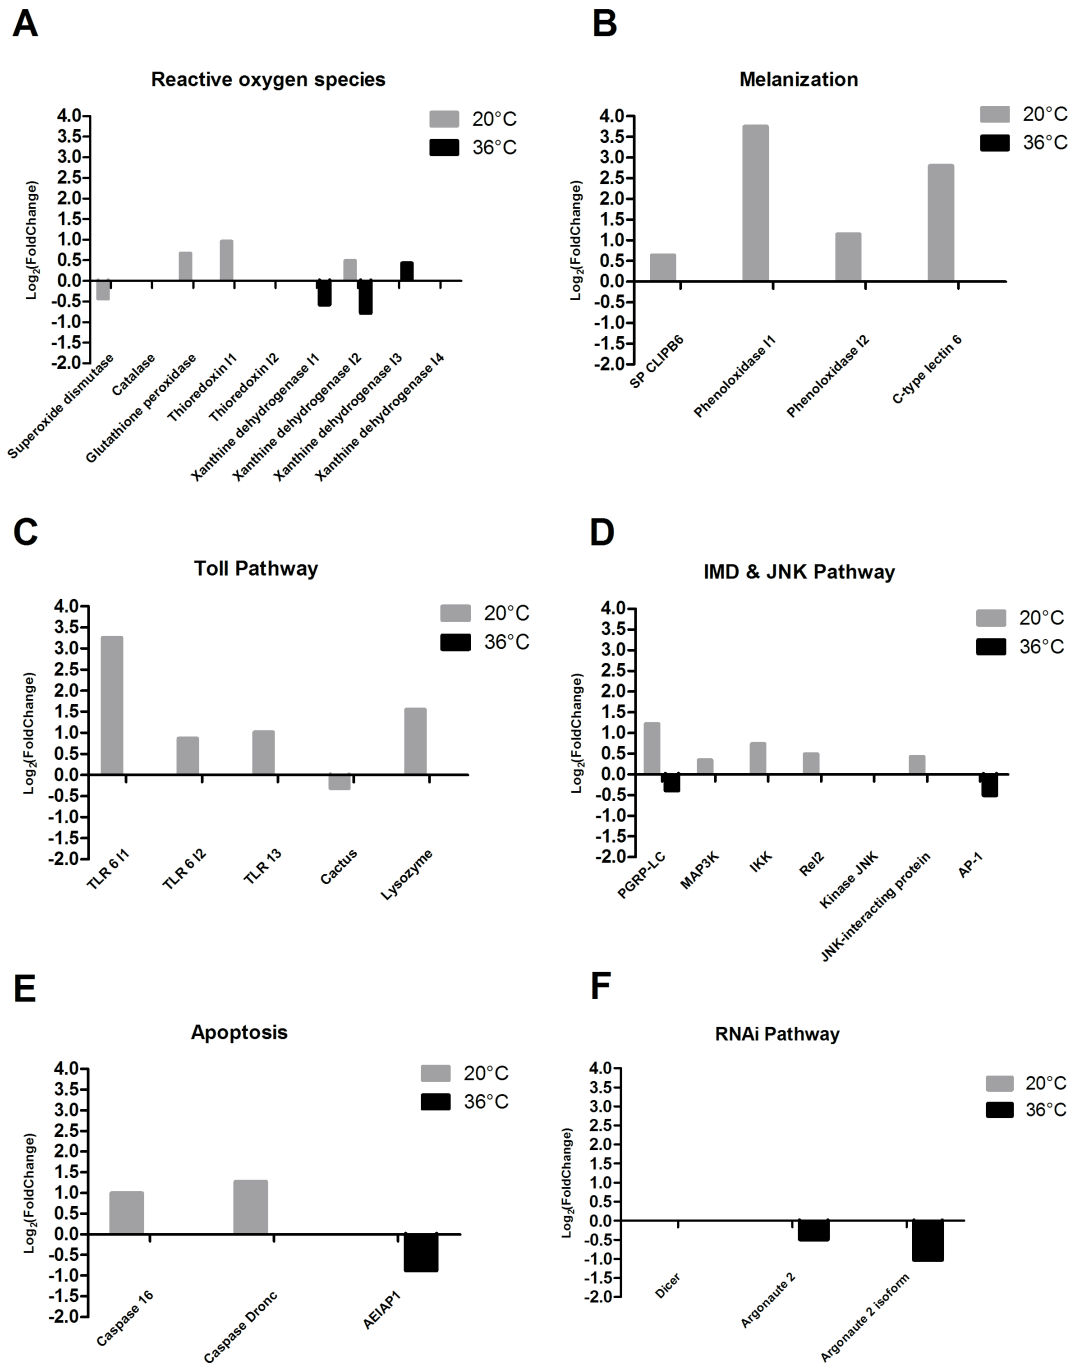

**Supplementary Figure S4. Analysis of differentially expressed genes related to the immune response in ZIKV-infected mosquitoes maintained at 20°C and 36°C compared to those kept at 28°C 48 hours after blood-feeding (A) Reactive Oxygen Species; (B) Melanization; (C) Toll Pathway; (D) IMD & JNK Pathway; (E) Apoptosis; (F) RNAi Pathway.**

**A**

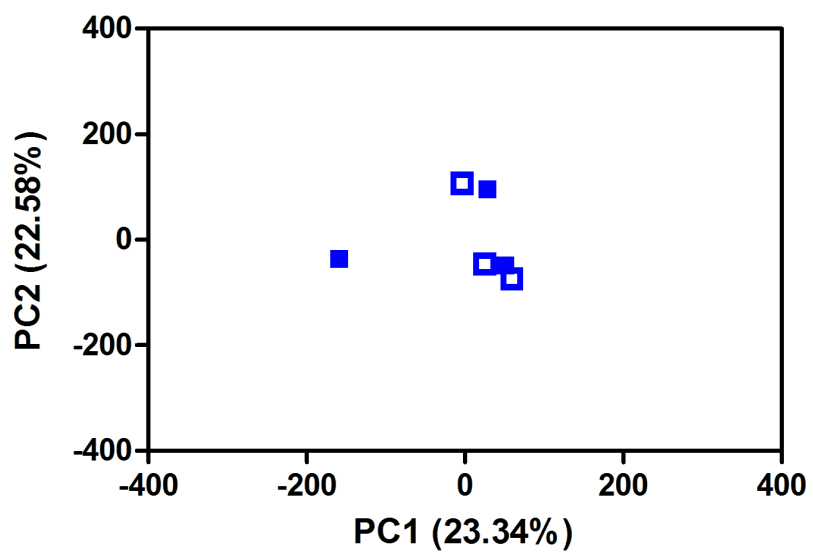

**B**

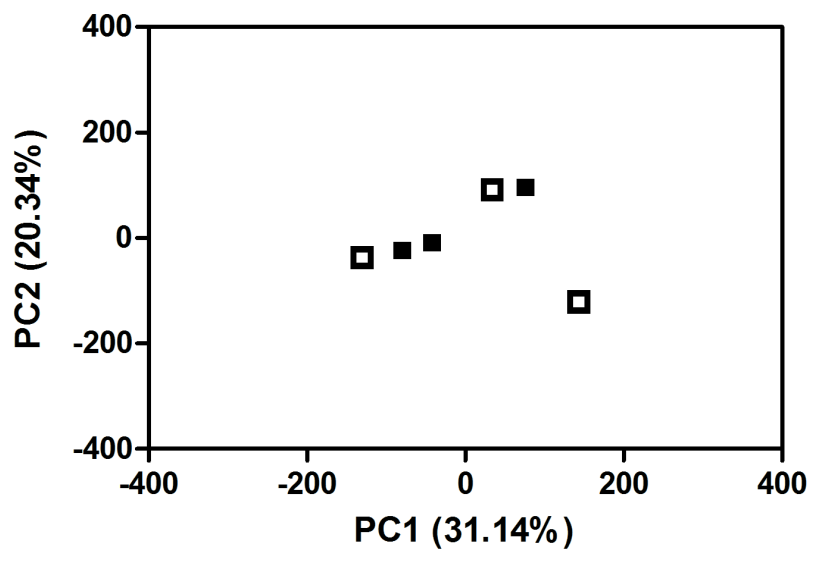

**C**

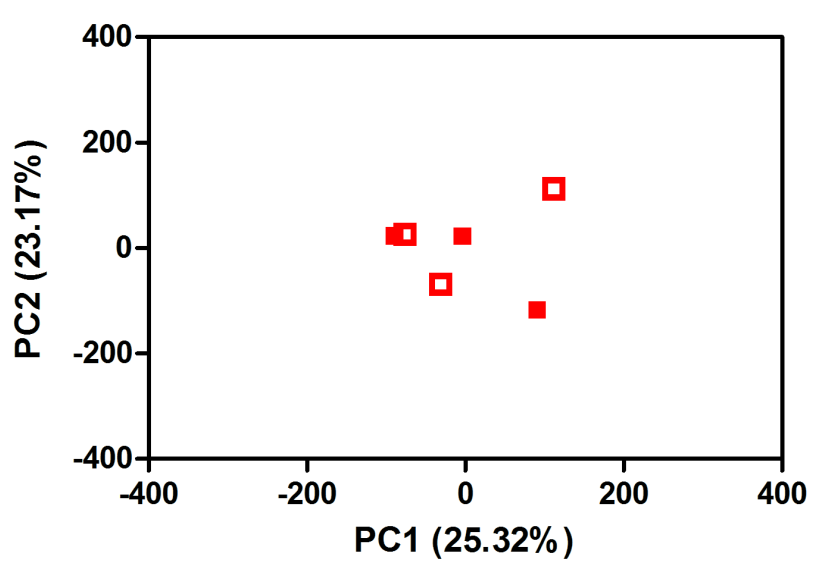

**Supplementary Figure S5. The Principal Component Analysis (PCA) of the effect of the Zika infection in three different constant temperatures (A) 20°C (B) 28°C (C) 36°C at 24hs. Open diamond: non-exposed mosquitoes. Closed diamond: ZIKV-exposed mosquitoes.**

**A**

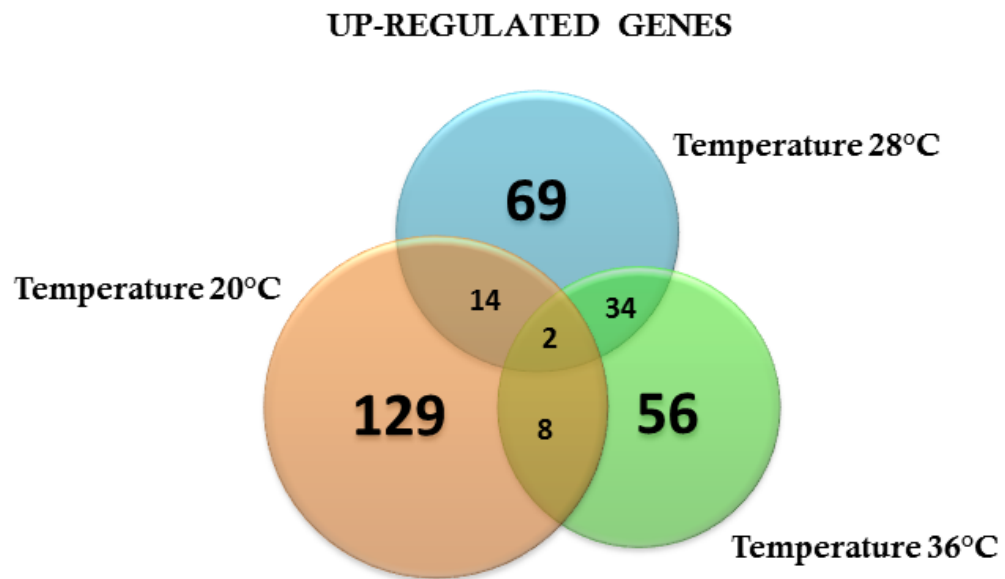

**B**

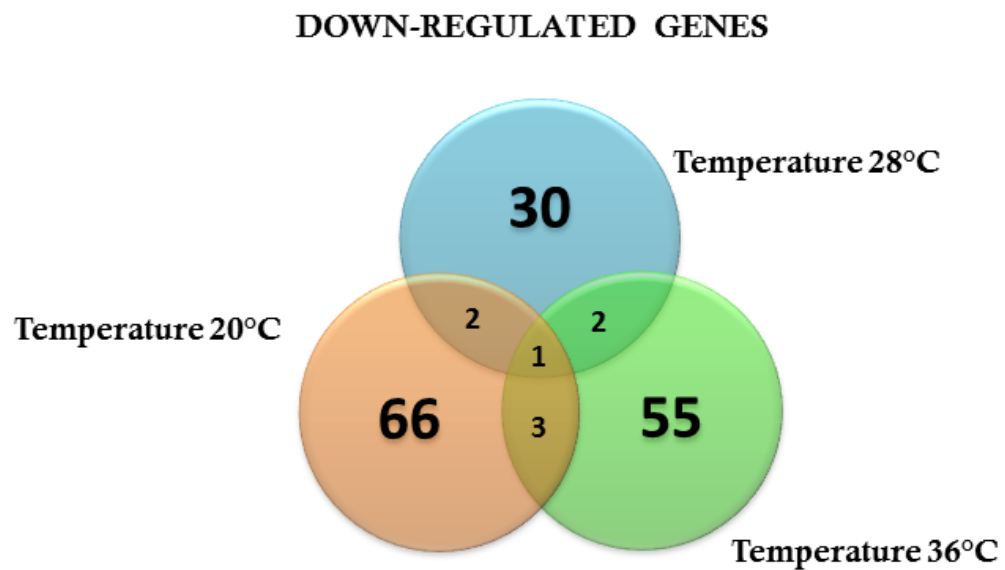

Supplementary Figure S6. Venn diagram representing the number of specific differentially expressed genes for Zika infected *A. aegypti* exposed in three different constant temperatures (20°C, 28°C, 36°C) (A) Up regulated genes (B) Down regulated genes at 24hs.

## **Supplementary Table Captions**

**Supplementary Table S1. Differentially expressed genes in mosquitoes held at 20°C relative to those held at 28°C 24 and 48hs after uninfected control blood meal.**

**Supplementary Table S2. Differentially expressed genes in mosquitoes held at 36°C relative to those held at 28°C 24 and 48hs after uninfected control blood meal.**

**Supplementary Table S3. Differentially expressed genes involved in oxidative stress and innate immunity in mosquitoes held at 20°C and 36°C relative to those held at 28°C 48hs after uninfected control blood meal.**

**Supplementary Table S4. Differentially expressed genes involved in oxidative stress and innate immunity in mosquitoes held at 20°C and 36°C relative to those held at 28°C 48hs after ZIKV-positive blood meal.**

**Supplementary Table S5. Differentially expressed genes in mosquitoes held at 20°C relative to those held at 28°C 24 and 48hs after ZIKV-positive blood meal.**

**Supplementary Table S6. Differentially expressed genes in mosquitoes held at 36°C relative to those held at 28°C 24 and 48hs after ZIKV-positive blood meal.**

**Supplementary Table S7. Differentially expressed genes in mosquitoes 24 and 48 hours after ZIKV-positive blood meal relative to mosquitoes fed with uninfected blood held at 20°C.**

**Supplementary Table S8. Differentially expressed genes in mosquitoes 24 and 48 hours after ZIKV-positive blood meal relative to mosquitoes fed with uninfected blood held at 28°C.**

**Supplementary Table S9. Differentially expressed genes in mosquitoes 24 and 48 hours after ZIKV-positive blood meal relative to mosquitoes fed with uninfected blood held at 36°C.**
